# Supplementary material
Source: publisher site journal article supplement (https://www.dovepress.com/article/441622)
Supplement: Supplementary file 1 [file get_supplementary_file.php]

1 **Supplementary Table 1.** Total and subscores of the QoR-15 questionnaire

|            | Group S<br>(n = 36) | Group R<br>(n = 36) | Mean difference<br>(95% CI) | P-value |
|------------|---------------------|---------------------|-----------------------------|---------|
| Total      |                     |                     |                             |         |
| Preop      | 127.3 (15.1)        | 127.0 (14.8)        | -1.3 (-8.4, 5.7)            | 0.706   |
| POD1       | 114.3 (18.9)        | 120.2 (18.8)        | 5.9 (-3.0, 14.8)            | 0.189   |
| POD2       | 130.6 (13.5)        | 130.4 (17.4)        | -0.3 (-7.6, 7.1)            | 0.946   |
| Question 1 |                     |                     |                             |         |
| Preop      | 10.0 (0.0)          | 10.0 (0.0)          | 0 (-0.7, 0.7)               | > 0.999 |
| POD1       | 8.4 (2.6)           | 9.2 (1.9)           | 0.8 (0.1, 1.4)              | 0.035   |
| POD2       | 9.2 (1.4)           | 9.7 (1.0)           | 0.4 (-0.3, 1.1)             | 0.208   |
| Question 2 |                     |                     |                             |         |
| Preop      | 9.9 (0.5)           | 10.0 (0.0)          | 0.1 (-0.1, 0.3)             | 0.321   |
| POD1       | 6.3 (3.2)           | 7.4 (2.7)           | 1.2 (-0.2, 2.6)             | 0.104   |
| POD2       | 8.0 (2.1)           | 8.2 (2.2)           | 0.2 (-0.8, 1.2)             | 0.662   |
| Question 3 |                     |                     |                             |         |
| Preop      | 8.8 (2.2)           | 8.9 (2.1)           | 0.1 (-1.0, 1.1)             | 0.915   |
| POD1       | 7.4 (2.7)           | 6.9 (2.7)           | 0.5 (-1.8, 0.7)             | 0.410   |
| POD2       | 8.5 (1.9)           | 8.5 (1.7)           | -0.0 (-0.9, 0.8)            | 0.949   |
| Question 4 |                     |                     |                             |         |
| Preop      | 7.4 (3.0)           | 7.0 (3.2)           | -0.3 (-1.8, 1.1)            | 0.651   |
| POD1       | 5.7 (3.6)           | 5.4 (3.1)           | -0.3 (-1.9, 1.3)            | 0.699   |
| POD2       | 7.9 (2.2)           | 7.6 (2.9)           | -0.3 (-1.6, 0.9)            | 0.588   |
| Question 5 |                     |                     |                             |         |
| Preop      | 9.8 (0.7)           | 9.6 (1.8)           | -0.3 (-0.9, 0.4)            | 0.452   |
| POD1       | 8.1 (2.7)           | 9.1 (2.2)           | 1.0 (-0.1, 2.2)             | 0.080   |
| POD2       | 9.5 (1.1)           | 9.3 (2.0)           | -0.2 (-0.9, 0.6)            | 0.605   |
| Question 6 |                     |                     |                             |         |
| Preop      | 10.0 (0.0)          | 10.0 (0.0)          | 0.0 (-0.7, 0.7)             | > 0.999 |
| POD1       | 8.1 (2.9)           | 9.4 (1.3)           | 1.3 (0.6, 1.9)              | < 0.001 |
| POD2       | 9.3 (1.2)           | 9.4 (1.4)           | 0.2 (-0.5, 0.9)             | 0.634   |
| Question 7 |                     |                     |                             |         |
| Preop      | 10.0 (0.0)          | 10.0 (0.0)          | 0.0 (-0.3, 0.35)            | > 0.999 |
| POD1       | 9.8 (0.9)           | 9.9 (0.4)           | 0.1 (-0.2, 0.4)             | 0.409   |

|             |       |           |           |                  |         |
|-------------|-------|-----------|-----------|------------------|---------|
|             | POD2  | 9.9 (0.4) | 9.8 (0.9) | -0.1 (-0.4, 0.1) | 0.302   |
| Question 8  |       |           |           |                  |         |
|             | Preop | 6.5 (2.9) | 6.5 (2.7) | -0.0 (-1.3, 1.3) | 0.966   |
|             | POD1  | 6.1 (3.6) | 6.7 (3.5) | 0.6 (-1.1, 2.3)  | 0.467   |
|             | POD2  | 7.4 (2.9) | 7.4 (3.0) | 0.0 (-1.4, 1.4)  | 0.968   |
| Question 9  |       |           |           |                  |         |
|             | Preop | 8.8 (2.5) | 8.2 (2.4) | -0.6 (-1.7, 0.7) | 0.318   |
|             | POD1  | 8.6 (2.3) | 8.4 (2.3) | -0.2 (-1.2, 0.9) | 0.759   |
|             | POD2  | 9.1 (1.6) | 9.1 (2.0) | -0.0 (-0.9, 0.8) | 0.949   |
| Question 10 |       |           |           |                  |         |
|             | Preop | 8.8 (1.5) | 8.4 (2.1) | -0.4 (-1.2, 0.5) | 0.419   |
|             | POD1  | 7.5 (2.3) | 8.0 (2.1) | 0.4 (-0.6, 1.5)  | 0.402   |
|             | POD2  | 8.3 (1.9) | 8.3 (2.3) | -0.1 (-1.0, 0.9) | 0.911   |
| Question 11 |       |           |           |                  |         |
|             | Preop | 4.6 (2.5) | 4.7 (2.2) | 0.1 (-1.0, 1.2)  | 0.882   |
|             | POD1  | 5.5 (2.4) | 5.6 (3.0) | 0.2 (-1.1, 1.4)  | 0.793   |
|             | POD2  | 7.3 (2.2) | 7.1 (2.6) | -0.3 (-1.4, 0.9) | 0.655   |
| Question 12 |       |           |           |                  |         |
|             | Preop | 6.8 (3.7) | 7.1 (3.3) | 0.3 (-1.4, 1.9)  | 0.764   |
|             | POD1  | 7.7 (2.6) | 7.9 (3.2) | 0.2 (-1.2, 1.5)  | 0.810   |
|             | POD2  | 8.6 (2.4) | 8.0 (2.7) | 0 (-1.2, 1.2)    | > 0.999 |
| Question 13 |       |           |           |                  |         |
|             | Preop | 9.9 (0.5) | 9.9 (0.2) | 0.1 (-0.1, 0.2)  | 0.523   |
|             | POD1  | 7.0 (3.2) | 8.8 (2.3) | 1.8 (0.5, 3.1)   | 0.009   |
|             | POD2  | 9.0 (1.7) | 9.6 (1.3) | 0.5 (-0.2, 1.2)  | 0.133   |
| Question 14 |       |           |           |                  |         |
|             | Preop | 7.0 (3.0) | 6.9 (2.9) | -0.1 (-1.5, 1.3) | 0.906   |
|             | POD1  | 8.7 (2.0) | 8.4 (2.7) | -0.3 (-1.5, 0.8) | 0.556   |
|             | POD2  | 9.3 (1.3) | 9.0 (2.2) | -0.3 (-1.1, 0.6) | 0.513   |
| Question 15 |       |           |           |                  |         |
|             | Preop | 9.1 (1.7) | 8.0 (2.6) | -1.0 (-2.0, 0.1) | 0.068   |
|             | POD1  | 9.2 (1.6) | 8.9 (2.4) | -0.3 (-1.2, 0.7) | 0.561   |
|             | POD2  | 9.3 (1.4) | 9.3 (2.0) | -0.1 (-0.9, 0.8) | 0.892   |

2 **Notes:** Values are presented as the estimated mean and standard deviation. Post-hoc tests were conducted according to time, group, and  
3 group\*time.

4 **Abbreviations:** S, sevoflurane; R, remimazolam; QoR, quality of recovery; preop, preoperative day; POD1, postoperative day 1; POD2,  
5 postoperative day 2

6

7 **Supplementary Figure 1** Total QoR-15 score.

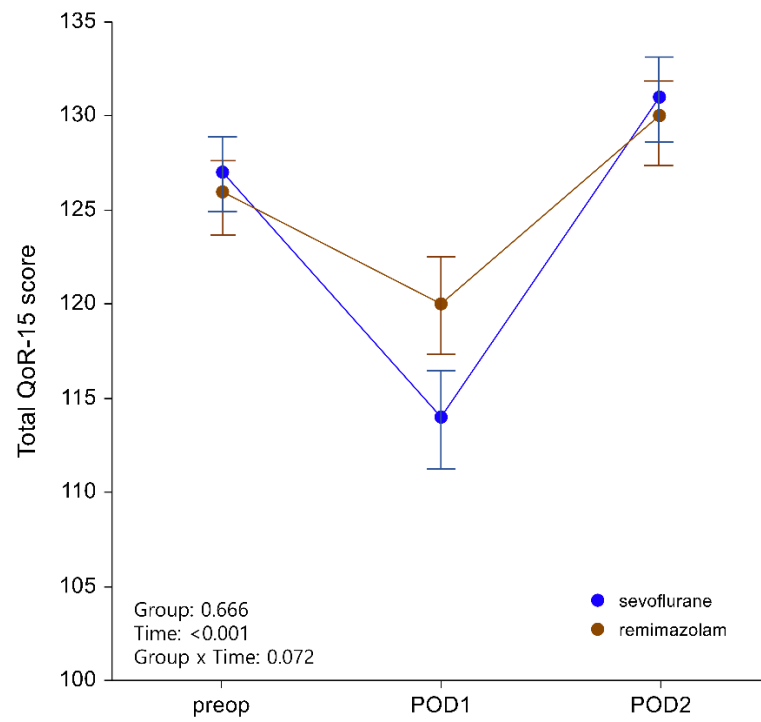

8

9 Values are presented as the estimated mean and standard error.

10 POD, postoperative day; preop, preoperative; QoR, quality of recovery

11

12 **Supplementary Figure 2** Sub-scores of the five dimensions of the QoR-15.

13 (A) Physical comfort, (B) emotional state, (C) psychological support, (D) physical independence, and (E) pain.

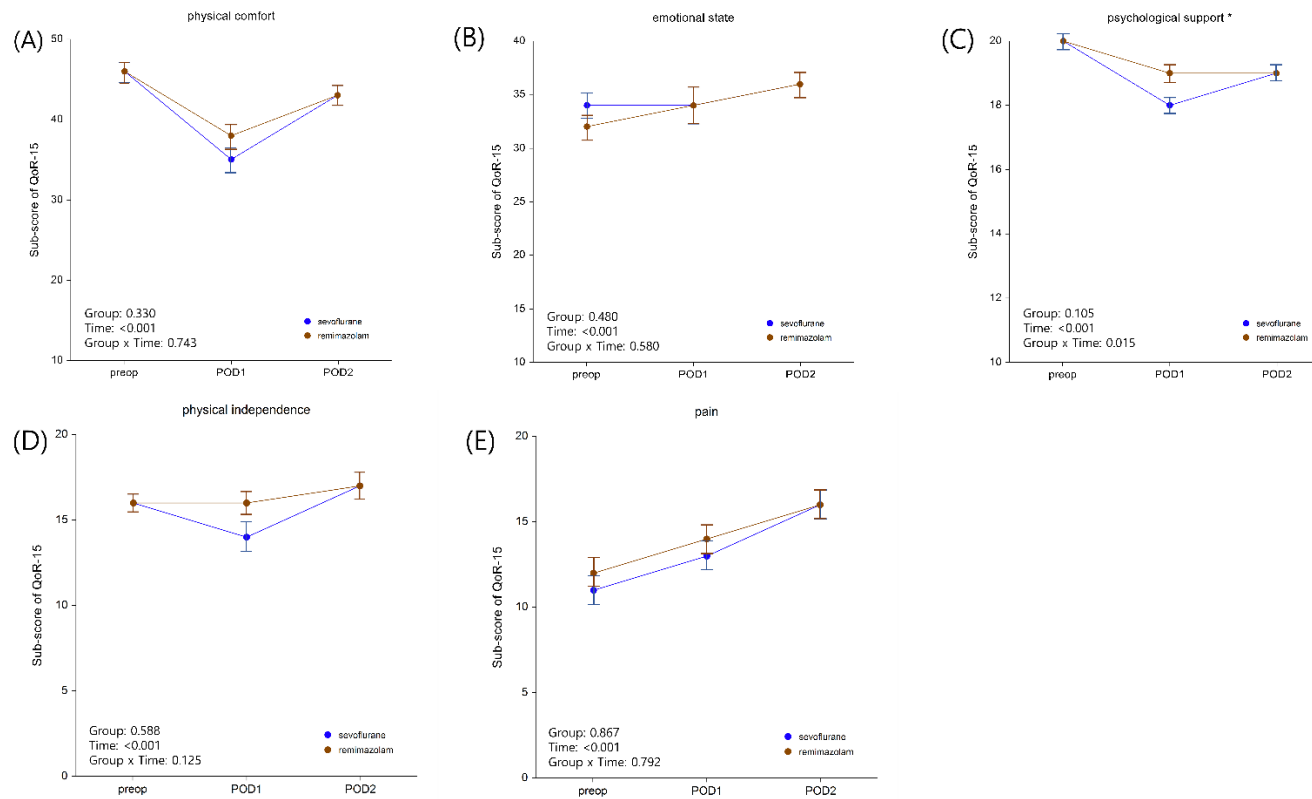

14

15 Values are presented as the estimated mean and standard error. Asterisk represents significant interaction between the group and time in the  
 16 psychological aspect.

17 POD, postoperative day; preop, preoperative; QoR, quality of recovery

18 **Supplementary Figure 3** Perioperative data, (A) SBP, (B) DBP, (C) MBP, (D) HR, (E) SpO<sub>2</sub> and (F) PSI.

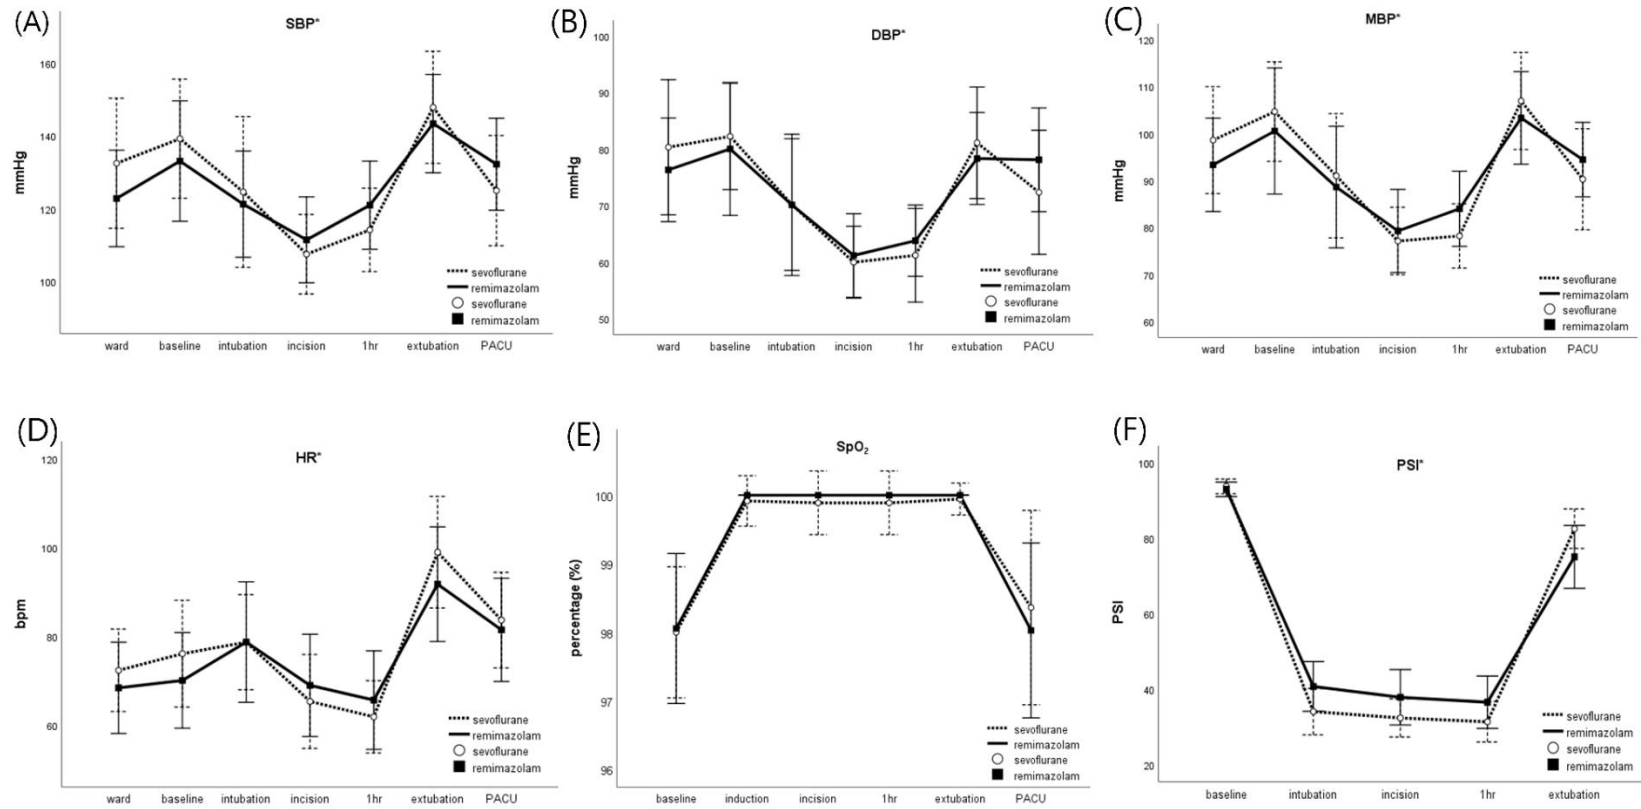

19

20 Values are presented as the estimated mean and standard deviation.

21 Asterisk represents variables with significant interaction between the group and time. (A; p=0.002, B; p<0.001, C; p<0.001, D; p<0.001, E;

22 p=0.391, F; p<0.001, in terms of between the group and time, respectively)
